# Supplementary material
Source: publisher figshare collection journal article supplement (https://plos.figshare.com/articles/dataset/_/3882453)
Supplement: Supplementary file [file 1]

| Characteristic            | <i>BRCA1</i> |            |                | <i>BRCA2</i> |            |                |
|---------------------------|--------------|------------|----------------|--------------|------------|----------------|
|                           | Total        | unaffected | ovarian cancer | Total        | unaffected | ovarian cancer |
| N                         | 15252        | 12790      | 2462           | 8211         | 7580       | 631            |
| Person time (years)       | 684487       | 558166     | 126321         | 389820       | 353972     | 35848          |
| Mean age (SD)             | 45(12)       | 44(12)     | 51(9)          | 47(13)       | 47(13)     | 57(10)         |
| Age at censoring          | N(%)         | N(%)       | N(%)           | N(%)         | N(%)       | N(%)           |
| [0,20)                    | 89(0.6)      | 89(0.7)    | 0(0)           | 36(0.4)      | 36(0.5)    | 0(0)           |
| [20,30)                   | 1283(8.4)    | 1271(9.9)  | 12(0.5)        | 602(7.3)     | 597(7.9)   | 5(0.8)         |
| [30,40)                   | 4093(26.8)   | 3867(30.2) | 226(9.2)       | 1761(21.4)   | 1747(23)   | 14(2.2)        |
| [40,50)                   | 5030(33)     | 4119(32.2) | 911(37)        | 2543(31)     | 2411(31.8) | 132(21.1)      |
| [50,60)                   | 3060(20.1)   | 2197(17.2) | 863(35.1)      | 1850(22.5)   | 1619(21.3) | 231(36.9)      |
| [60,70)                   | 1234(8.1)    | 870(6.8)   | 364(14.8)      | 987(12)      | 796(10.5)  | 191(30.5)      |
| [70,80)                   | 463(3.0)     | 390(3.0)   | 73(3.0)        | 432(5.3)     | 379(5.0)   | 53(8.5)        |
| Year of birth             |              |            |                |              |            |                |
| [1900,1920)               | 67(0.4)      | 58(0.5)    | 9(0.4)         | 60(0.7)      | 48(0.6)    | 12(1.9)        |
| [1920,1930)               | 326(2.1)     | 210(1.6)   | 116(4.7)       | 258(3.1)     | 196(2.6)   | 62(9.8)        |
| [1930,1940)               | 939(6.2)     | 589(4.6)   | 350(14.2)      | 696(8.5)     | 533(7)     | 163(25.8)      |
| [1940,1950)               | 2429(15.9)   | 1657(13)   | 772(31.4)      | 1506(18.3)   | 1267(16.7) | 239(37.9)      |
| [1950,1960)               | 3939(25.8)   | 3157(24.7) | 782(31.8)      | 2155(26.2)   | 2029(26.8) | 126(20)        |
| [1960,1990)               | 7545(49.5)   | 7112(55.6) | 433(17.6)      | 3536(43.1)   | 3507(46.3) | 29(4.6)        |
| Ovarian cancer morphology |              |            | N(%)           |              |            | N(%)           |
| Serous                    |              |            | 795(68)        |              |            | 196(66)        |
| Mucinous                  |              |            | 15(1)          |              |            | 7(2)           |
| Endometrioid              |              |            | 128(11)        |              |            | 35(12)         |
| Clear cell                |              |            | 14(1)          |              |            | 6(2)           |
| Other                     |              |            | 212(19)        |              |            | 52(18)         |

Table S2: Characteristics of study participants. Mean age corresponds to the age at censoring. SD corresponds to the standard deviation, N corresponds to the number of individuals.
