# Supplementary material
Source: publisher figshare collection journal article supplement (https://plos.figshare.com/articles/dataset/_/3882453)
Supplement: Supplementary file [file 1]

| SNP               | Position | Ref. | Eff.  | T | <i>BRCA1</i> |      |             |                 | <i>BRCA2</i> |      |             |                 | Meta-analysis |             |                 |
|-------------------|----------|------|-------|---|--------------|------|-------------|-----------------|--------------|------|-------------|-----------------|---------------|-------------|-----------------|
|                   |          |      |       |   | MAF          | HR   | 95%CI       | p-value         | MAF          | HR   | 95%CI       | p-value         | HR            | 95%CI       | p-value         |
| <b>rs7046326</b>  | 16847520 | G    | A     | Y | 0.25         | 0.74 | (0.69,0.79) | <b>2.92e-16</b> | 0.24         | 0.74 | (0.64,0.84) | <b>1.33e-05</b> | 0.74          | (0.69,0.79) | <b>6.21e-21</b> |
| <b>rs10124837</b> | 16891647 | T    | C     | N | 0.24         | 0.73 | (0.79,0.68) | <b>1.99e-16</b> | 0.23         | 0.74 | (0.85,0.64) | <b>2.38e-05</b> | 0.73          | (0.69,0.78) | <b>7.54e-21</b> |
| rs4961501         | 16851678 | G    | T     | N | 0.25         | 0.74 | (0.79,0.69) | <b>3.78e-16</b> | 0.24         | 0.74 | (0.84,0.64) | <b>1.27e-05</b> | 0.74          | (0.69,0.79) | <b>7.75e-21</b> |
| rs10810647        | 16853779 | T    | C     | N | 0.25         | 0.74 | (0.79,0.69) | <b>4.35e-16</b> | 0.24         | 0.73 | (0.84,0.64) | <b>1.11e-05</b> | 0.74          | (0.69,0.79) | <b>7.94e-21</b> |
| rs7868157         | 16851977 | A    | C     | N | 0.24         | 0.74 | (0.79,0.69) | <b>6.45e-16</b> | 0.24         | 0.74 | (0.85,0.64) | <b>1.5e-05</b>  | 0.74          | (0.69,0.79) | <b>1.58e-20</b> |
| rs10962662        | 16889937 | C    | A     | Y | 0.24         | 0.74 | (0.68,0.79) | <b>5.7e-16</b>  | 0.23         | 0.74 | (0.64,0.85) | <b>2.06e-05</b> | 0.74          | (0.69,0.79) | <b>1.91e-20</b> |
| rs10756823        | 16878616 | C    | A     | N | 0.24         | 0.74 | (0.69,0.79) | <b>1.01e-15</b> | 0.23         | 0.74 | (0.64,0.85) | <b>1.82e-05</b> | 0.74          | (0.69,0.79) | <b>3.06e-20</b> |
| rs10962643        | 16857403 | C    | A     | N | 0.32         | 0.77 | (0.72,0.82) | <b>3.2e-14</b>  | 0.31         | 0.74 | (0.66,0.84) | <b>4.95e-06</b> | 0.76          | (0.72,0.81) | <b>3.21e-19</b> |
| rs139555631       | 16890684 | C    | CTATT | N | 0.28         | 0.74 | (0.79,0.68) | <b>9.74e-16</b> | 0.27         | 0.77 | (0.88,0.67) | 0.00024         | 0.74          | (0.7,0.79)  | <b>4.13e-19</b> |
| rs113780397       | 16907584 | G    | A     | N | 0.32         | 0.77 | (0.72,0.83) | <b>1.1e-13</b>  | 0.32         | 0.74 | (0.65,0.84) | <b>2.32e-06</b> | 0.77          | (0.72,0.81) | <b>6.17e-19</b> |
| rs181552334       | 16907646 | A    | G     | N | 0.32         | 0.77 | (0.72,0.83) | <b>1.11e-13</b> | 0.32         | 0.74 | (0.65,0.84) | <b>2.31e-06</b> | 0.77          | (0.72,0.81) | <b>6.17e-19</b> |

Table S5: SNPs within 100 times likely of being causal for the association with ovarian cancer in the meta-analysis of *BRCA1* and *BRCA2* mutation carriers. 'T' correspond to genotyped; 'Ref' and 'Eff' correspond to reference and effector allele, respectively; 'MAF' to minimum allele frequency, 'HR' hazard ratio and 'CI' confidence interval. Bold cells correspond to the strongest associated SNP in the indicated dataset. Green, violet and orange text indicate those SNPs within 100 times likely of being the causal variant/s in *BRCA1* and *BRCA2* mutation carriers and their meta-analysis, respectively.
