# Supplementary material
Source: publisher figshare collection journal article supplement (https://plos.figshare.com/articles/dataset/_/3882453)
Supplement: Supplementary file [file 1]

| SNP            | Position | Ref.        | Eff.  | T | BRCA1 |      |      |             |          | BRCA2 |      |      |             |          |
|----------------|----------|-------------|-------|---|-------|------|------|-------------|----------|-------|------|------|-------------|----------|
|                |          |             |       |   | Info  | MAF  | HR   | 95%CI       | p-value  | Info  | MAF  | HR   | 95%CI       | p-value  |
| rs10124837     | 16891647 | T           | C     | N | 0.98  | 0.24 | 0.73 | (0.79,0.68) | 1.99e-16 | 0.98  | 0.23 | 0.74 | (0.85,0.64) | 2.38e-05 |
| rs7046326      | 16847520 | G           | A     | Y | 0.99  | 0.25 | 0.74 | (0.69,0.79) | 2.92e-16 | 1.00  | 0.24 | 0.74 | (0.64,0.84) | 1.33e-05 |
| rs4961501      | 16851678 | G           | T     | N | 0.97  | 0.25 | 0.74 | (0.79,0.69) | 3.78e-16 | 0.98  | 0.24 | 0.74 | (0.84,0.64) | 1.27e-05 |
| rs10810647     | 16853779 | T           | C     | N | 0.98  | 0.25 | 0.74 | (0.79,0.69) | 4.35e-16 | 0.98  | 0.24 | 0.73 | (0.84,0.64) | 1.11e-05 |
| rs10962662     | 16889937 | C           | A     | Y | 1.00  | 0.24 | 0.74 | (0.68,0.79) | 5.7e-16  | 1.00  | 0.23 | 0.74 | (0.64,0.85) | 2.06e-05 |
| rs7868157      | 16851977 | A           | C     | N | 0.97  | 0.24 | 0.74 | (0.79,0.69) | 6.45e-16 | 0.94  | 0.24 | 0.74 | (0.85,0.64) | 1.5e-05  |
| rs139555631    | 16890684 | C           | CTATT | N | 0.90  | 0.28 | 0.74 | (0.79,0.68) | 9.74e-16 | 0.90  | 0.27 | 0.77 | (0.88,0.67) | 0.00024  |
| rs10756823     | 16878616 | C           | A     | N | 0.98  | 0.24 | 0.74 | (0.69,0.79) | 1.01e-15 | 0.98  | 0.23 | 0.74 | (0.64,0.85) | 1.82e-05 |
| rs10962643     | 16857403 | C           | A     | N | 0.97  | 0.32 | 0.77 | (0.72,0.82) | 3.2e-14  | 0.97  | 0.31 | 0.74 | (0.66,0.84) | 4.95e-06 |
| rs113780397    | 16907584 | G           | A     | N | 0.97  | 0.32 | 0.77 | (0.72,0.83) | 1.1e-13  | 0.97  | 0.32 | 0.74 | (0.65,0.84) | 2.32e-06 |
| rs181552334    | 16907646 | A           | G     | N | 0.97  | 0.32 | 0.77 | (0.72,0.83) | 1.11e-13 | 0.97  | 0.32 | 0.74 | (0.65,0.84) | 2.31e-06 |
| rs55689948     | 16908169 | A           | G     | N | 0.97  | 0.33 | 0.78 | (0.73,0.83) | 1.35e-13 | 0.98  | 0.32 | 0.75 | (0.66,0.84) | 4.69e-06 |
| rs112442786    | 16908402 | CTGGGAGGAAG | C     | N | 0.98  | 0.33 | 0.78 | (0.73,0.83) | 1.43e-13 | 0.98  | 0.32 | 0.75 | (0.66,0.85) | 4.81e-06 |
| rs7045767      | 16910898 | G           | C     | Y | 0.99  | 0.33 | 0.78 | (0.73,0.83) | 1.65e-13 | 0.99  | 0.32 | 0.75 | (0.66,0.85) | 6.8e-06  |
| rs7866677      | 16909051 | T           | C     | N | 0.98  | 0.33 | 0.78 | (0.73,0.83) | 1.71e-13 | 0.98  | 0.32 | 0.75 | (0.66,0.85) | 4.98e-06 |
| rs10962684     | 16909333 | G           | A     | N | 0.98  | 0.33 | 0.78 | (0.73,0.83) | 1.91e-13 | 0.98  | 0.32 | 0.75 | (0.66,0.85) | 5.31e-06 |
| rs35884621     | 16911411 | T           | TA    | N | 0.99  | 0.33 | 0.78 | (0.73,0.83) | 2.24e-13 | 0.99  | 0.32 | 0.75 | (0.66,0.85) | 6.2e-06  |
| rs4366169      | 16911638 | A           | C     | Y | 1.00  | 0.33 | 0.78 | (0.73,0.83) | 2.6e-13  | 1.00  | 0.32 | 0.75 | (0.66,0.85) | 8.56e-06 |
| rs10738467     | 16910677 | C           | T     | Y | 1.00  | 0.33 | 0.78 | (0.73,0.83) | 3.08e-13 | 1.00  | 0.32 | 0.75 | (0.66,0.85) | 5.93e-06 |
| rs10738468     | 16910763 | A           | G     | Y | 1.00  | 0.33 | 0.78 | (0.73,0.83) | 3.8e-13  | 1.00  | 0.32 | 0.75 | (0.66,0.85) | 7.56e-06 |
| rs4445329      | 16911757 | G           | A     | Y | 1.00  | 0.33 | 0.78 | (0.73,0.83) | 4.18e-13 | 1.00  | 0.32 | 0.75 | (0.66,0.85) | 7.6e-06  |
| rs3814113      | 16915021 | T           | C     | Y | 1.00  | 0.33 | 0.78 | (0.73,0.83) | 5.15e-13 | 1.00  | 0.32 | 0.75 | (0.66,0.85) | 6.7e-06  |
| rs10810671     | 16914835 | A           | C     | Y | 0.97  | 0.34 | 0.78 | (0.73,0.83) | 5.69e-13 | 1.00  | 0.32 | 0.75 | (0.66,0.85) | 6.21e-06 |
| rs7032221      | 16914895 | A           | G     | Y | 1.00  | 0.33 | 0.78 | (0.73,0.83) | 5.77e-13 | 1.00  | 0.32 | 0.75 | (0.66,0.85) | 6.71e-06 |
| rs7048397      | 16914703 | T           | C     | N | 0.99  | 0.33 | 0.78 | (0.73,0.84) | 5.92e-13 | 0.99  | 0.32 | 0.75 | (0.66,0.85) | 6.55e-06 |
| rs6475094      | 16913616 | G           | A     | N | 0.98  | 0.33 | 0.78 | (0.73,0.84) | 6.23e-13 | 0.98  | 0.32 | 0.75 | (0.66,0.85) | 6.47e-06 |
| rs10962693     | 16916693 | C           | T     | N | 0.87  | 0.31 | 0.77 | (0.83,0.72) | 6.23e-13 | 0.88  | 0.30 | 0.75 | (0.86,0.66) | 2.68e-05 |
| rs6475093      | 16913514 | G           | C     | N | 0.98  | 0.33 | 0.78 | (0.73,0.84) | 6.39e-13 | 0.98  | 0.32 | 0.75 | (0.66,0.85) | 6.43e-06 |
| rs6475092      | 16913473 | G           | A     | N | 0.98  | 0.33 | 0.78 | (0.73,0.84) | 6.4e-13  | 0.98  | 0.32 | 0.75 | (0.66,0.85) | 6.46e-06 |
| rs4465052      | 16913043 | A           | G     | N | 0.98  | 0.33 | 0.78 | (0.73,0.84) | 6.75e-13 | 0.98  | 0.32 | 0.75 | (0.66,0.85) | 5.33e-06 |
| rs4246134      | 16912988 | C           | T     | N | 0.98  | 0.33 | 0.78 | (0.73,0.84) | 6.91e-13 | 0.98  | 0.32 | 0.75 | (0.66,0.85) | 5.38e-06 |
| rs35353585     | 16913171 | T           | TTTG  | N | 0.98  | 0.33 | 0.78 | (0.73,0.84) | 6.94e-13 | 0.98  | 0.32 | 0.75 | (0.66,0.85) | 6.41e-06 |
| rs4631563      | 16913286 | C           | A     | N | 0.98  | 0.33 | 0.78 | (0.73,0.84) | 7.19e-13 | 0.98  | 0.32 | 0.75 | (0.66,0.85) | 6.51e-06 |
| rs34131140     | 16913829 | A           | AT    | N | 0.98  | 0.33 | 0.78 | (0.73,0.84) | 7.29e-13 | 0.98  | 0.32 | 0.75 | (0.66,0.85) | 6.03e-06 |
| rs62543585     | 16906889 | T           | C     | Y | 1.00  | 0.20 | 0.75 | (0.69,0.81) | 1.59e-12 | 1.00  | 0.19 | 0.69 | (0.59,0.8)  | 1.04e-06 |
| rs72713890     | 16906510 | G           | C     | N | 0.99  | 0.20 | 0.75 | (0.7,0.81)  | 2.19e-12 | 0.99  | 0.19 | 0.69 | (0.6,0.8)   | 1.39e-06 |
| c9-pos16896307 | 16906307 | A           | G     | Y | 1.00  | 0.20 | 0.75 | (0.7,0.81)  | 2.3e-12  | 1.00  | 0.19 | 0.69 | (0.59,0.8)  | 1.2e-06  |
| rs62543581     | 16906006 | C           | A     | N | 0.99  | 0.20 | 0.75 | (0.7,0.81)  | 2.32e-12 | 0.99  | 0.19 | 0.69 | (0.59,0.8)  | 1.14e-06 |
| rs139327399    | 16906238 | AC          | A     | N | 0.99  | 0.20 | 0.75 | (0.7,0.81)  | 2.43e-12 | 0.99  | 0.19 | 0.69 | (0.59,0.8)  | 1.17e-06 |
| c9-pos16896152 | 16906152 | A           | G     | Y | 1.00  | 0.20 | 0.75 | (0.7,0.81)  | 2.47e-12 | 1.00  | 0.19 | 0.69 | (0.59,0.8)  | 1.22e-06 |
| c9-pos16896094 | 16906094 | C           | T     | Y | 1.00  | 0.20 | 0.75 | (0.7,0.81)  | 2.52e-12 | 1.00  | 0.19 | 0.69 | (0.59,0.8)  | 1.22e-06 |
| c9-pos16895922 | 16905922 | C           | T     | Y | 1.00  | 0.20 | 0.75 | (0.7,0.81)  | 2.55e-12 | 1.00  | 0.19 | 0.69 | (0.59,0.8)  | 1.18e-06 |
| rs34606230     | 16903362 | A           | T     | N | 0.98  | 0.20 | 0.75 | (0.69,0.81) | 2.74e-12 | 0.98  | 0.19 | 0.69 | (0.6,0.81)  | 1.96e-06 |
| rs62543579     | 16905170 | T           | C     | N | 0.99  | 0.20 | 0.75 | (0.7,0.81)  | 2.86e-12 | 0.99  | 0.19 | 0.69 | (0.59,0.8)  | 1.22e-06 |
| rs10962670     | 16896588 | C           | T     | N | 0.98  | 0.20 | 0.75 | (0.7,0.82)  | 3.77e-12 | 0.98  | 0.19 | 0.70 | (0.6,0.81)  | 2.27e-06 |
| c9-pos16894635 | 16904635 | C           | G     | Y | 1.00  | 0.20 | 0.76 | (0.7,0.82)  | 5.12e-12 | 1.00  | 0.19 | 0.70 | (0.6,0.81)  | 2.15e-06 |
| c9-pos16889285 | 16899285 | T           | C     | Y | 0.99  | 0.20 | 0.76 | (0.7,0.82)  | 7.7e-12  | 1.00  | 0.19 | 0.70 | (0.6,0.81)  | 2.38e-06 |
| rs10962664     | 16891561 | T           | C     | N | 0.98  | 0.20 | 0.76 | (0.7,0.82)  | 8.31e-12 | 0.98  | 0.19 | 0.70 | (0.6,0.81)  | 2.73e-06 |
| rs10962665     | 16891590 | A           | G     | N | 0.98  | 0.20 | 0.76 | (0.7,0.82)  | 8.37e-12 | 0.98  | 0.19 | 0.70 | (0.6,0.81)  | 2.73e-06 |
| rs80039758     | 16908383 | C           | G     | N | 0.98  | 0.20 | 0.76 | (0.7,0.82)  | 1.15e-11 | 0.98  | 0.19 | 0.69 | (0.6,0.8)   | 1.19e-06 |
| rs12376998     | 16909002 | A           | T     | N | 0.98  | 0.20 | 0.76 | (0.7,0.82)  | 1.38e-11 | 0.98  | 0.19 | 0.69 | (0.6,0.8)   | 1.33e-06 |
| 9-16909474     | 16909474 | G           | A     | N | 0.97  | 0.20 | 0.76 | (0.7,0.82)  | 1.98e-11 | 0.98  | 0.19 | 0.70 | (0.6,0.81)  | 2.69e-06 |
| 9-16909473     | 16909473 | T           | TAC   | N | 0.97  | 0.20 | 0.76 | (0.7,0.82)  | 1.99e-11 | 0.98  | 0.19 | 0.70 | (0.6,0.81)  | 2.69e-06 |
| 9-16909475     | 16909475 | T           | TG    | N | 0.97  | 0.20 | 0.76 | (0.7,0.82)  | 1.99e-11 | 0.98  | 0.19 | 0.70 | (0.6,0.81)  | 2.69e-06 |
| rs199782476    | 16909476 | A           | AGCT  | N | 0.97  | 0.20 | 0.76 | (0.7,0.82)  | 1.99e-11 | 0.98  | 0.19 | 0.70 | (0.6,0.81)  | 2.69e-06 |
| c9-pos16900214 | 16910214 | A           | C     | Y | 1.00  | 0.20 | 0.76 | (0.71,0.83) | 2.21e-11 | 0.99  | 0.20 | 0.70 | (0.6,0.81)  | 2.01e-06 |
| rs10962691     | 16915105 | C           | G     | Y | 1.00  | 0.20 | 0.76 | (0.71,0.83) | 2.63e-11 | 1.00  | 0.20 | 0.70 | (0.61,0.81) | 2.48e-06 |
| rs10810666     | 16911666 | C           | T     | Y | 1.00  | 0.20 | 0.76 | (0.71,0.83) | 2.73e-11 | 1.00  | 0.19 | 0.69 | (0.6,0.81)  | 1.66e-06 |
| rs62543619     | 16914716 | G           | A     | N | 0.98  | 0.20 | 0.76 | (0.71,0.83) | 2.78e-11 | 0.99  | 0.19 | 0.70 | (0.6,0.81)  | 2.46e-06 |
| rs10810665     | 16911400 | G           | A     | Y | 1.00  | 0.20 | 0.76 | (0.71,0.83) | 2.79e-11 | 1.00  | 0.19 | 0.69 | (0.6,0.81)  | 1.66e-06 |
| rs62543618     | 16914578 | C           | T     | N | 0.98  | 0.20 | 0.76 | (0.71,0.83) | 2.87e-11 | 0.99  | 0.19 | 0.70 | (0.6,0.81)  | 2.21e-06 |
| rs12377421     | 16913768 | G           | A     | N | 0.98  | 0.20 | 0.76 | (0.71,0.83) | 3.17e-11 | 0.98  | 0.19 | 0.70 | (0.6,0.81)  | 1.78e-06 |
| rs10756819     | 16858084 | A           | G     | Y | 1.00  | 0.34 | 0.80 | (0.85,0.75) | 3.24e-11 | 1.00  | 0.33 | 0.77 | (0.87,0.68) | 2.66e-05 |
| rs12377389     | 16913557 | C           | T     | N | 0.98  | 0.20 | 0.76 | (0.71,0.83) | 3.65e-11 | 0.99  | 0.19 | 0.69 | (0.6,0.8)   | 1.57e-06 |
| rs10962692     | 16915874 | G           | C     | N | 0.92  | 0.20 | 0.76 | (0.7,0.82)  | 3.99e-11 | 0.93  | 0.19 | 0.69 | (0.6,0.81)  | 2.75e-06 |
| rs10810668     | 16912435 | G           | C     | Y | 0.99  | 0.20 | 0.77 | (0.71,0.83) | 5.04e-11 | 1.00  | 0.19 | 0.70 | (0.6,0.81)  | 2.04e-06 |
| rs10810669     | 16912661 | C           | T     | Y | 0.98  | 0.20 | 0.77 | (0.71,0.83) | 5.93e-11 | 0.99  | 0.20 | 0.70 | (0.6,0.81)  | 1.57e-06 |
| rs10810670     | 16912663 | C           | T     | Y | 1.00  | 0.20 | 0.77 | (0.71,0.83) | 6.56e-11 | 1.00  | 0.19 | 0.69 | (0.6,0.81)  | 1.55e-06 |
| rs200306057    | 16892783 | T           | TTTTA | N | 0.68  | 0.30 | 0.76 | (0.82,0.7)  | 7.45e-11 | 0.68  | 0.30 | 0.69 | (0.81,0.59) | 2.97e-06 |
| rs10962666     | 16892272 | G           | A     | Y | 1.00  | 0.20 | 0.77 | (0.71,0.83) | 1.09e-10 | 1.00  | 0.19 | 0.70 | (0.6,0.81)  | 1.63e-06 |
| rs34987069     | 16912842 | CT          | C     | N | 0.93  | 0.30 | 0.79 | (0.74,0.85) | 1.57e-10 | 0.94  | 0.29 | 0.73 | (0.64,0.83) | 2.54e-06 |
| rs10962659     | 16883318 | G           | C     | N | 0.98  | 0.15 | 0.76 | (0.69,0.83) | 7.98e-10 | 0.98  | 0.14 | 0.71 | (0.6,0.84)  | 7.68e-05 |
| rs10962649     | 16873535 | C           | T     | Y | 1.00  | 0.15 | 0.76 | (0.69,0.83) | 8.98e-10 | 1.00  | 0.15 | 0.72 | (0.61,0.85) | 8.99e-05 |
| rs12376099     | 16889023 | G           | A     | N | 0.98  | 0.15 | 0.76 | (0.69,0.83) | 9.05e-10 | 0.98  | 0.14 | 0.71 | (0.6,0.84)  | 5.59e-05 |
| rs10962658     | 16881346 | G           | A     | N | 0.98  | 0.15 | 0.76 | (0.69,0.83) | 9.36e-10 | 0.98  | 0.15 | 0.71 | (0.6,0.84)  | 6.49e-05 |
| c9-pos16875464 | 16885464 | A           | G     | Y | 1.00  | 0.15 | 0.76 | (0.7,0.83)  | 9.54e-10 | 1.00  | 0.15 | 0.72 | (0.61,0.85) | 9.17e-05 |
| rs10962653     | 16876736 | T           | C     | N | 0.99  | 0.15 | 0.76 | (0.69,0.83) | 1.02e-09 | 0.99  | 0.15 | 0.71 | (0.6,0.84)  | 7.14e-05 |
| rs62541926     | 16877423 | T           | C     | N | 0.99  | 0.15 | 0.76 | (0.69,0.83) | 1.05e-09 | 0.99  | 0.15 | 0.71 | (0.6,0.84)  | 6.72e-   |

|                |          |       |     |   |      |      |      |             |          |      |      |      |             |          |
|----------------|----------|-------|-----|---|------|------|------|-------------|----------|------|------|------|-------------|----------|
| rs140047332    | 16877723 | GC    | G   | N | 0.99 | 0.15 | 0.76 | (0.69,0.83) | 1.06e-09 | 0.99 | 0.15 | 0.71 | (0.6,0.84)  | 6.56e-05 |
| rs62541927     | 16888222 | C     | G   | N | 0.98 | 0.15 | 0.76 | (0.69,0.83) | 1.14e-09 | 0.98 | 0.14 | 0.71 | (0.6,0.84)  | 7.99e-05 |
| rs10962656     | 16877788 | G     | A   | Y | 1.00 | 0.15 | 0.76 | (0.7,0.83)  | 1.2e-09  | 1.00 | 0.15 | 0.71 | (0.6,0.83)  | 4.42e-05 |
| rs11789875     | 16872323 | G     | A   | N | 0.98 | 0.15 | 0.76 | (0.7,0.83)  | 1.52e-09 | 0.98 | 0.15 | 0.71 | (0.6,0.84)  | 6.15e-05 |
| rs10962652     | 16874878 | A     | G   | N | 0.97 | 0.15 | 0.76 | (0.69,0.83) | 2.19e-09 | 0.97 | 0.14 | 0.71 | (0.6,0.84)  | 5.98e-05 |
| rs62541923     | 16870501 | C     | A   | N | 0.98 | 0.15 | 0.76 | (0.7,0.83)  | 2.24e-09 | 0.98 | 0.15 | 0.71 | (0.6,0.84)  | 5.95e-05 |
| rs200648906    | 16871360 | C     | CG  | N | 0.98 | 0.15 | 0.76 | (0.7,0.83)  | 2.41e-09 | 0.98 | 0.15 | 0.71 | (0.6,0.84)  | 6.93e-05 |
| rs62541922     | 16870182 | T     | C   | N | 0.98 | 0.15 | 0.76 | (0.7,0.83)  | 2.64e-09 | 0.98 | 0.15 | 0.71 | (0.6,0.84)  | 6.55e-05 |
| rs201753327    | 16906414 | T     | TA  | N | 0.96 | 0.25 | 0.80 | (0.74,0.86) | 3.22e-09 | 0.96 | 0.25 | 0.73 | (0.64,0.84) | 9.08e-06 |
| rs10962679     | 16905441 | C     | T   | N | 0.98 | 0.26 | 0.80 | (0.86,0.75) | 3.37e-09 | 0.98 | 0.25 | 0.73 | (0.84,0.64) | 6.28e-06 |
| rs10962642     | 16857292 | G     | T   | N | 0.96 | 0.16 | 0.77 | (0.71,0.84) | 6.74e-09 | 0.97 | 0.16 | 0.72 | (0.61,0.85) | 8.64e-05 |
| rs11788047     | 16858569 | G     | A   | N | 0.98 | 0.16 | 0.78 | (0.71,0.85) | 1.61e-08 | 0.98 | 0.16 | 0.72 | (0.61,0.84) | 7.19e-05 |
| rs62541877     | 16852453 | G     | A   | N | 0.97 | 0.16 | 0.78 | (0.71,0.85) | 2.04e-08 | 0.97 | 0.16 | 0.71 | (0.6,0.83)  | 3.84e-05 |
| rs62541878     | 16861205 | A     | T   | N | 0.98 | 0.16 | 0.78 | (0.72,0.85) | 2.13e-08 | 0.98 | 0.16 | 0.72 | (0.62,0.85) | 9.67e-05 |
| rs62541879     | 16861508 | A     | G   | N | 0.98 | 0.16 | 0.78 | (0.72,0.85) | 2.14e-08 | 0.98 | 0.16 | 0.72 | (0.62,0.85) | 9.78e-05 |
| rs12379687     | 16854367 | G     | T   | Y | 1.00 | 0.16 | 0.78 | (0.72,0.85) | 2.46e-08 | 1.00 | 0.16 | 0.71 | (0.61,0.83) | 3.57e-05 |
| rs10962648     | 16868958 | G     | C   | Y | 1.00 | 0.16 | 0.78 | (0.72,0.85) | 2.48e-08 | 1.00 | 0.16 | 0.73 | (0.62,0.85) | 9.97e-05 |
| rs10962647     | 16868380 | T     | G   | Y | 0.93 | 0.17 | 0.78 | (0.72,0.85) | 2.86e-08 | 0.99 | 0.16 | 0.73 | (0.62,0.85) | 0.000105 |
| rs60043391     | 16856277 | A     | T   | N | 0.46 | 0.27 | 1.34 | (1.21,1.48) | 2.93e-08 | 0.48 | 0.27 | 1.48 | (1.23,1.79) | 5.25e-05 |
| rs200868580    | 16862913 | A     | ATT | N | 0.98 | 0.16 | 0.78 | (0.85,0.72) | 3.43e-08 | 0.98 | 0.16 | 0.73 | (0.85,0.62) | 0.000125 |
| c9-pos16855291 | 16865291 | G     | A   | Y | 1.00 | 0.16 | 0.78 | (0.72,0.85) | 3.91e-08 | 1.00 | 0.16 | 0.73 | (0.62,0.85) | 0.000112 |
| rs10690336     | 16853296 | TAGTC | T   | N | 0.97 | 0.16 | 0.78 | (0.85,0.72) | 4.75e-08 | 0.97 | 0.16 | 0.72 | (0.85,0.61) | 7.53e-05 |
| rs12379183     | 16865699 | A     | G   | Y | 0.99 | 0.23 | 0.82 | (0.76,0.88) | 2.07e-07 | 0.98 | 0.23 | 0.76 | (0.66,0.87) | 7.16e-05 |

Table S4: SNPs within 100 times likely of being causal for the association with ovarian cancer in *BRCA1* and *BRCA2* mutation carriers. This set was defined based on a likelihood ratio less or equal than 100 times relative to the most significant variant and  $r^2 > 0.1$  with the top SNP. 'T' correspond to genotyped; 'Info' measures the accuracy of the imputation; 'Ref' and 'Ef' correspond to reference and effector allele, respectively; 'MAF' to minor allele frequency, 'HR' hazard ratio and 'CI' confidence interval. Bold cells correspond to the strongest associated SNP in the indicated dataset. Green and violet text indicate the set of potentially causal variant/s in *BRCA1* and *BRCA2* mutation carriers, respectively.
